# Supplementary material
Source: publisher site journal article supplement (https://www.dovepress.com/article/303453)
Supplement: Supplementary file 1 [file get_supplementary_file.php]

APPENDIX

Table A1. Inclusion Diagnosis Codes

| **Condition** | **ICD-9 Diagnosis Codes** | **ICD-10 Diagnosis Codes** |
| --- | --- | --- |
| Schizophrenia | 295.00-295.05, 295.10-295.15, 295.20-295.25, 295.30-295.35, 295.40-295.45, 295.50-295.55, 295.60-295.65, 295.70-295.75, 295.80-295.85, 295.90-295.95 | F20, F20.2, F20.9, F20.8, F20.89, F20.81, F20.3, F20.0, F20.1, F20.5, F25, F25.9, F25.8, F25.0, F25.1 |
| Bipolar disorder | 296.00-296.06, 296.10-296.16, 296.40-296.46, 296.50-296.56, 296.60-296.66, 296.7, 296.80, 296.81, 296.82, 296.89 | F310, F3110, F3111, F3112, F3113, F312, F3130, F3131, F3132, F314, F315, F3160, F3161, F3162, F3163, F3164, F3173, F3174, F3175, F3176, F3177, F3178, F3181, F3189, F319 |
| Major depression | 296.20-296.26, 296.30-296.36, 311 | F320, F321, F322, F323, F324, F325, F329, F330, F331, F332, F333, F3341, F3342, F338, F339 |

Table A2. Antipsychotic Medications Included

| Abilify (Aripiprazole) | Prolixin (Fluphenazine) |
| --- | --- |
| Saphris (Asenapine Maleate) | Haldol (Haloperidol) |
| Rexulti (Brexpiprazole) | Fanapt (Iloperidone) |
| Vraylar (Cariprazine) | Adasuve, Loxitane (Loxapine) |
| Thorazine (Chlorpromazine) | Latuda (Lurasidone) |
| Clozaril (Clozapine) | Serentil (Mesoridazine besylate) |
| Inapsine (Droperidol) | Moban (Molindone) |
| Zyprexa (Olanzapine) | Seroquel (Quetiapine Fumarate) |
| Invega (Paliperidone) | Risperdal (Risperidone) |
| Trilafon (Perphenazine) | Mellaril (Thioridazine) |
| Nuplazid (Pimavanserin Tartrate) | Navane (Thiothixene) |
| Orap (Pimozide) | Stelazine (Trifluoperazine) |
| Compazine (Prochlorperazine) | Geodon (Ziprasidone) |
| Promazine |  |

Table A3. Substance Use/Abuse Conditions and Treatments Excluded

| Alcohol abuse | Alcohol dependence |
| --- | --- |
| Amphetamine abuse | Amphetamine dependence |
| Opioid abuse | Opioid dependence |
| Cannabis abuse | Cannabis dependence |
| Sedative, hypnotic, or anxiolytic abuse | Sedative, hypnotic, or anxiolytic dependence |
| Cocaine abuse | Cocaine dependence |
| Other stimulant abuse | Other stimulant dependence |
| Hallucinogen abuse | Hallucinogen dependence |
| Inhalant abuse | Inhalant dependence |
| Other psychoactive substance abuse | Other psychoactive substance dependence |
| Detoxification |  |
